# Supplementary material for: Study on the Selectivity of Molecular Imprinting Materials Determined through Hydrogen Bonding on Template Molecular Structures of Flavonoids
Source: MDPI journal article supplement (doi:10.3390/molecules29061292), 2024-03-14
Supplement: s1 [file s1]

Supplementary Figures

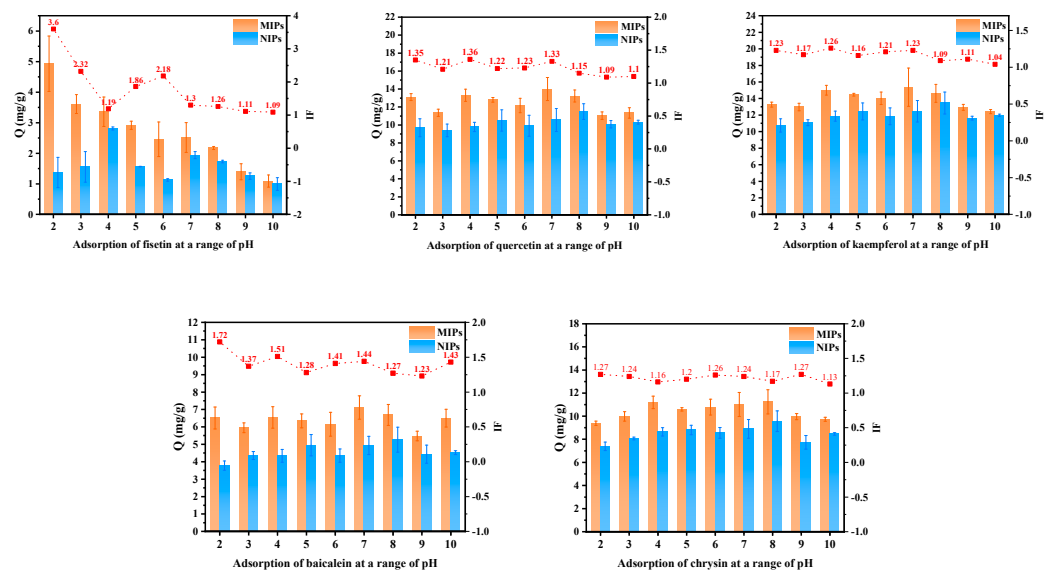

Supplementary Figure S1. Adsorption of the MIPs at a range of pH to flavonoids

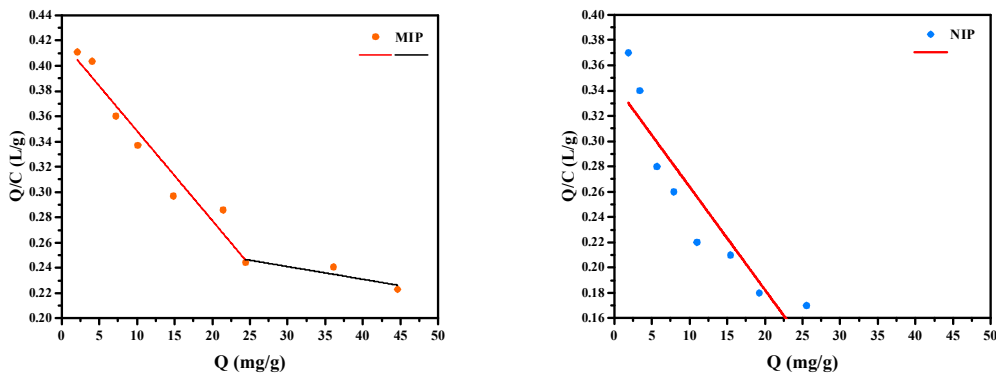

Supplementary Figure S2. Scatchard analysis curves of the MIP and NIP

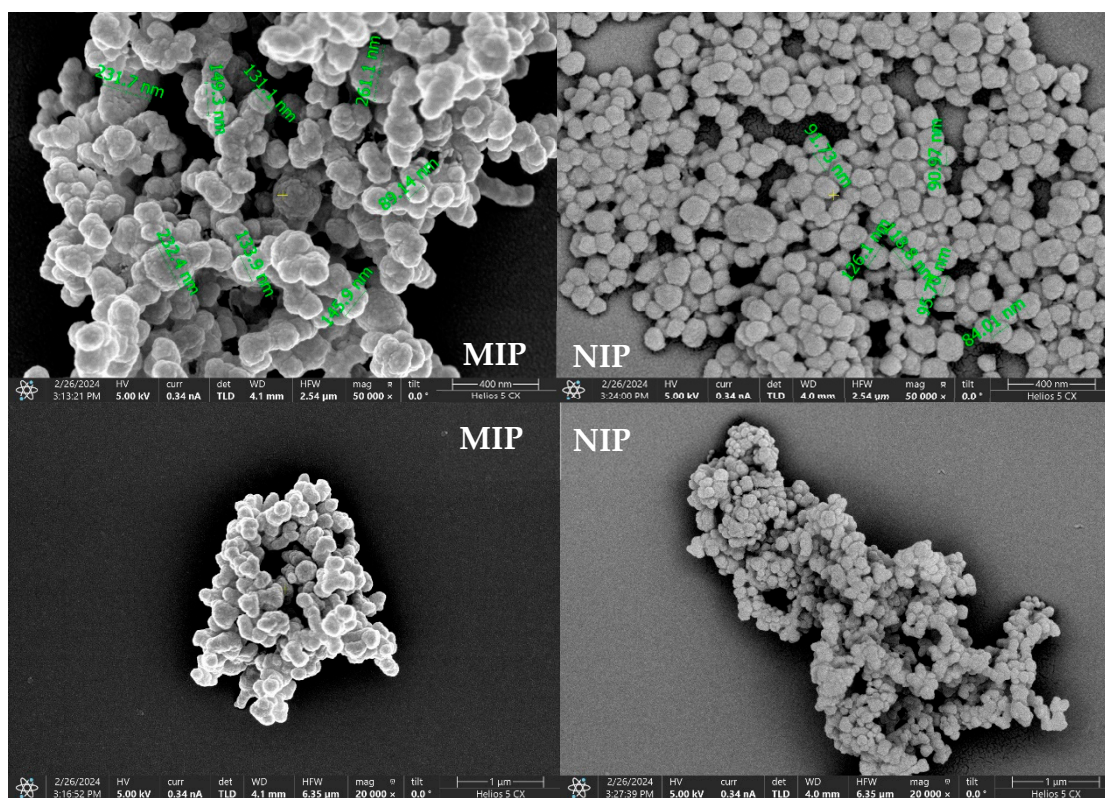

Supplementary Figure S3. Scanning electron microscope images of the MIP and NIP.
